# Supplementary material for: Lacking P2X7-receptors protects substantia nigra dopaminergic neurons and hippocampal-related cognitive performance from the deleterious effects of high-fat diet exposure in adult male mice
Source: Frontiers journal article supplement (doi:10.3389/fnut.2024.1289750), 2024-01-25
Supplement: Data_Sheet_1.PDF [file Data_Sheet_1.PDF]

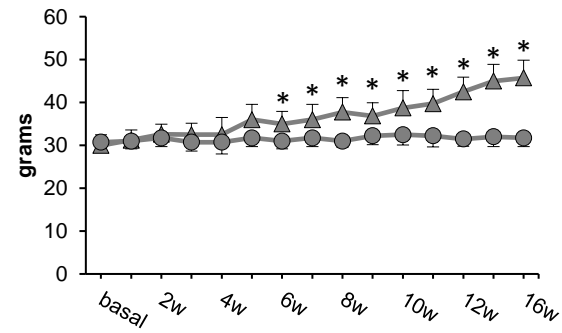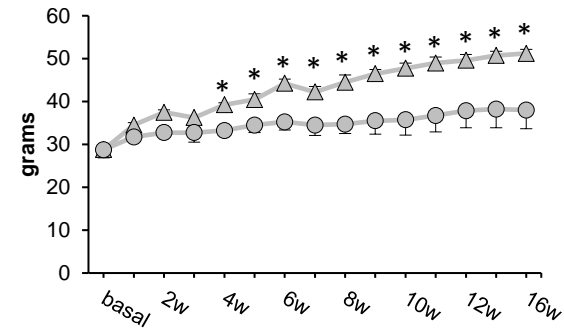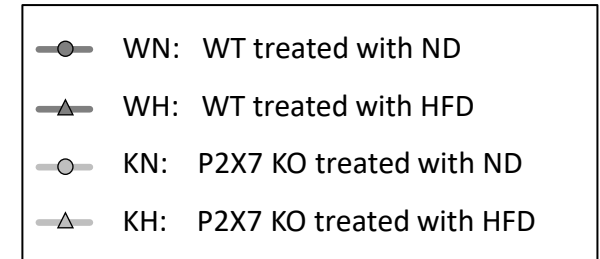

*Suppl Figure 1* Body weight measured weekly during the dietary treatment in all experimental groups (n=6 for each group).

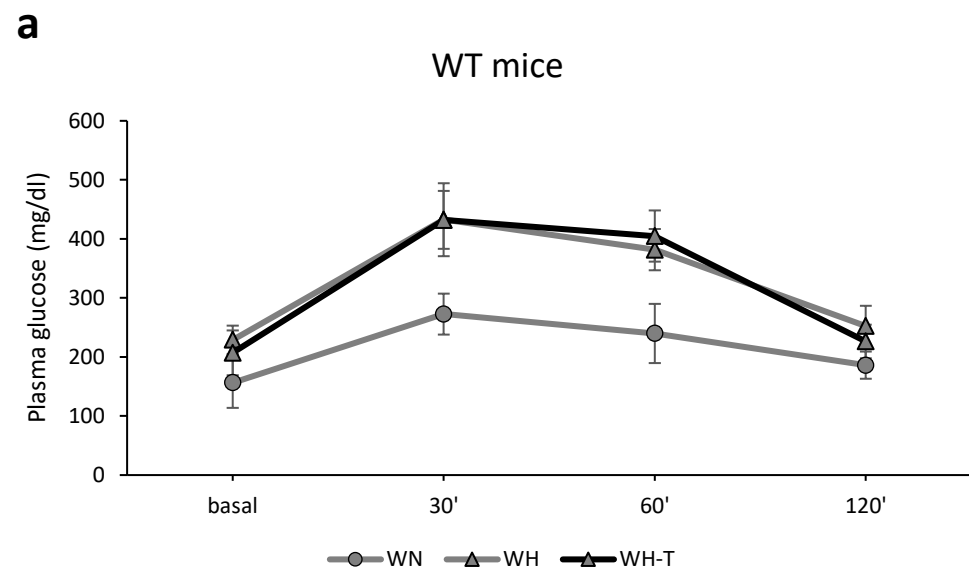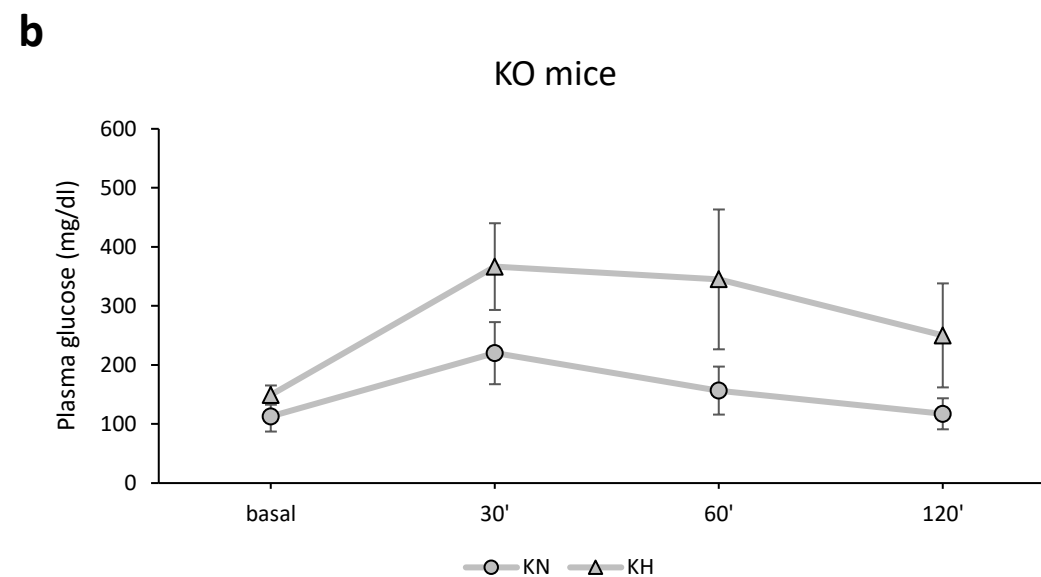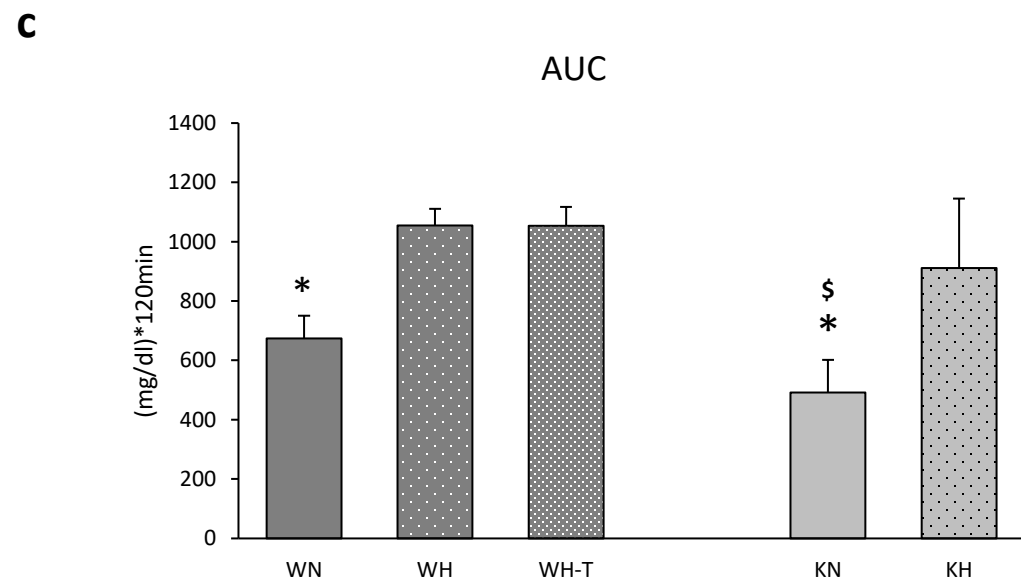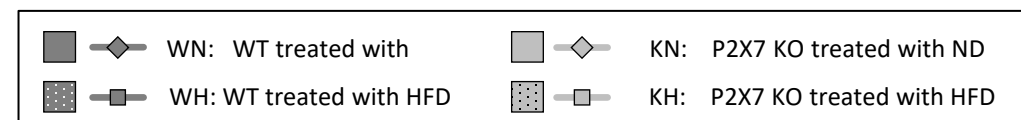

|                              |
|------------------------------|
| WN: WT treated with ND       |
| WH: WT treated with HFD      |
| KN: P2X7 KO treated with ND  |
| KH: P2X7 KO treated with HFD |

**Suppl Figure 2** Intraperitoneal Glucose Tolerance Test (IPGTT) performed after four months of normal (ND) or high fat diet (HFD) in WT (**a**) and P2X7R KO (**b**) mice. WH-T indicates animals treated with high fat diet and P2X7 receptor antagonist. Quantification of area under curve (AUC) is reported in **c**. Data are mean $\pm$ SD ((n=6 for each group, n=5 in the WH-T group). \*p<0.01 normal vs high fat diet. \$p<0.05 KN vs WN

Suppl Table 1

Parameters monitored during the dietary treatment at baseline and after four months in the four groups of mice (n=6 for each group).

|                | WT BASAL |          |      | WT 4 MONTHS |          |       | KO BASAL |          |      | KO 4 MONTHS |          |       |
|----------------|----------|----------|------|-------------|----------|-------|----------|----------|------|-------------|----------|-------|
|                | NFD      | HFD      | p    | NFD         | HFD      | p     | NFD      | HFD      | p    | NFD         | HFD      | p     |
| Weight         | 29 ± 1.9 | 28 ± 2.7 | n.s. | 34 ± 3.6    | 46 ± 4.1 | 0.011 | 29 ± 1.9 | 29 ± 0.8 | n.s. | 38 ± 4.2    | 51 ± 1.5 | 0.012 |
| Plasma Glucose | 158 ± 13 | 150 ± 10 | n.s. | 186 ± 70    | 204 ± 35 | n.s.  | 197 ± 41 | 203 ± 30 | n.s. | 139 ± 21    | 194 ± 58 | n.s.  |
| Triglycerides  | 120 ± 24 | 135 ± 34 | n.s. | 179 ± 44    | 158 ± 40 | n.s.  | 148 ± 9  | 163 ± 32 | n.s. | 188 ± 49    | 229± 43  | n.s.  |
| Cholesterol    | 155 ± 10 | 145 ± 8  | n.s. | 159 ± 17    | 178 ± 13 | 0.046 | 165 ± 20 | 178 ± 13 | n.s. | 157 ± 5     | 192 ± 23 | 0.012 |
| sGOT           | 69 ± 20  | 88 ± 26  | n.s. | 97 ± 36     | 114 ± 58 | n.s.  | 113 ± 38 | 86 ± 30  | n.s. | 107 ± 31    | 134 ± 53 | n.s.  |
